# Supplementary material for: Fungal and Bacterial Microbiome Associated with the Rhizosphere of Native Plants from the Atacama Desert
Source: PubMed Central journal article supplement (PMC7074712; doi:10.3390/microorganisms8020209), 2020-02-04
Supplement: microorganisms-08-00209-s001.pdf [file microorganisms-08-00209-s001.pdf]

**Supplementary table S1.** Trimming summary ITS2, showing number of initial reads, reads that passes quality control, number of sequences after merging them by their 3' and resulting non-chimeric ASV.

| <b>SampleID</b> | <b>Input</b> | <b>Denoised</b> | <b>Merged</b> | <b>Non-chimeric</b> |
|-----------------|--------------|-----------------|---------------|---------------------|
| Bs1             | 237439       | 197038          | 180342        | 160835              |
| Bs2             | 237572       | 191069          | 179966        | 163382              |
| Bs3             | 226647       | 194003          | 185833        | 155899              |
| Sc1             | 219013       | 179566          | 174092        | 139214              |
| Sc2             | 235699       | 188823          | 181094        | 145165              |
| Sc3             | 268787       | 221316          | 215965        | 166516              |

**Supplementary table S2.** Trimming summary 16S, showing number of initial reads, reads that passes quality control, number of sequences after merging them by their 3' and resulting non-chimeric ASV.

| <b>SampleID</b> | <b>Input</b> | <b>Denoised</b> | <b>Merged</b> | <b>Non-chimeric</b> |
|-----------------|--------------|-----------------|---------------|---------------------|
| Bs1             | 222461       | 143007          | 73638         | 47964               |
| Bs2             | 205171       | 126294          | 59986         | 40689               |
| Bs3             | 208628       | 137845          | 72140         | 47179               |
| Sc1             | 179903       | 109927          | 50973         | 38816               |
| Sc2             | 243159       | 152986          | 83377         | 54381               |
| Sc3             | 186513       | 123113          | 69646         | 46552               |

**Supplementary table S3.** Mean relative abundance of fungal phylum identified in *Baccharis scandens* and *Solanum chilense* rizhospheres.

| <b>Taxa [Phylum]</b>     | <b><i>Baccharis scandens</i></b> | <b><i>Solanum chilense</i></b> |
|--------------------------|----------------------------------|--------------------------------|
| <i>Ascomycota</i>        | 82.81 ± 4.69                     | 46.08 ± 3.59                   |
| <i>Basidiomycota</i>     | 2.60 ± 1.40                      | 12.64 ± 2.04                   |
| <i>Unid. Chromista</i>   | 0.27 ± 0.20                      | 0.42 ± 0.33                    |
| <i>Mucoromycota</i>      | 0.30 ± 0.17                      | 0.26 ± 0.01                    |
| <i>Mortierellomycota</i> | 0.24 ± 0.22                      | 0.23 ± 0.35                    |
| <i>Glomeromycota</i>     | 0.50 ± 0.53                      | 0.00 ± 0.00                    |
| <i>Chytridiomycota</i>   | 0.15 ± 0.08                      | 0.18 ± 0.09                    |

**Supplementary table S4.** Mean relative abundance 15 most abundant fungal families identified in *Baccharis scandens* and *Solanum chilense* rhizospheres.

| <b>Taxa [Family]</b>      | <b><i>Baccharis scandens</i></b> | <b><i>Solanum chilense</i></b> |
|---------------------------|----------------------------------|--------------------------------|
| <i>Aspergillaceae</i>     | 26.57 ± 21.19                    | 2.34 ± 0.26                    |
| <i>Pleosporaceae</i>      | 12.98 ± 13.14                    | 6.65 ± 4.02                    |
| <i>Nectriaceae</i>        | 6.34 ± 0.88                      | 9.20 ± 4.79                    |
| <i>Saccharomycetaceae</i> | 8.57 ± 7.23                      | 4.10 ± 4.24                    |
| <i>Dipodascaceae</i>      | 3.26 ± 1.77                      | 3.61 ± 3.47                    |
| <i>Cladosporiaceae</i>    | 4.33 ± 6.86                      | 0.69 ± 0.84                    |
| <i>Psathyrellaceae</i>    | 0.39 ± 0.27                      | 4.25 ± 0.28                    |
| <i>Filobasidiaceae</i>    | 0.89 ± 0.87                      | 3.40 ± 2.01                    |
| <i>Dydimellaceae</i>      | 2.64 ± 2.06                      | 1.32 ± 1.93                    |
| <i>Sporormiaceae</i>      | 1.86 ± 0.99                      | 1.55 ± 0.69                    |
| <i>Heliales i.s.</i>      | 3.16 ± 2.93                      | 0.09 ± 0.16                    |
| <i>Agaricaceae</i>        | 0.02 ± 0.02                      | 2.46 ± 2.22                    |
| <i>Pyronemataceae</i>     | 1.95 ± 1.36                      | 0.33 ± 0.22                    |
| <i>Ascobolaceae</i>       | 0.03 ± 0.03                      | 2.08 ± 3.56                    |
| <i>Chaetomiaceae</i>      | 0.54 ± 0.39                      | 1.38 ± 1.44                    |

**Supplementary table S5.** Mean relative abundance of bacterial phylum identified in *Baccharis scandens* and *Solanum chilense* rizhospheres.

| <b>Taxa [Phylum]</b>    | <b><i>Baccharis scandens</i></b> | <b><i>Solanum chilense</i></b> |
|-------------------------|----------------------------------|--------------------------------|
| <i>Actinobacteria</i>   | 38.9 ± 3.3                       | 26.9 ± 5.27                    |
| <i>Proteobacteria</i>   | 24.4 ± 0.84                      | 28.4 ± 3.80                    |
| <i>Bacteroidetes</i>    | 5.89 ± 1.4                       | 4.93 ± 1.65                    |
| <i>Planctomycetes</i>   | 2.82 ± 0.29                      | 5.18 ± 3.67                    |
| <i>Chloroflexi</i>      | 4.88 ± 0.57                      | 5.46 ± 2.37                    |
| <i>Firmicutes</i>       | 4.74 ± 1.2                       | 2.36 ± 0.31                    |
| <i>Cyanobacteria</i>    | 1.75 ± 1.52                      | 5.27 ± 3.06                    |
| <i>Acidobacteria</i>    | 1.85 ± 0.55                      | 3.98 ± 2.10                    |
| <i>Verrucomicrobia</i>  | 1.47 ± 0.34                      | 2.41 ± 0.68                    |
| <i>Gemmatimonadetes</i> | 1.74 ± 0.51                      | 1.73 ± 0.68                    |
| <i>TM7</i>              | 1.53 ± 0.16                      | 0.81 ± 0.17                    |
| <i>Nitrospirae</i>      | 0.17 ± 0.01                      | 0.49 ± 0.23                    |
| <i>Armatimonadetes</i>  | 0.11 ± 0.07                      | 0.31 ± 0.30                    |
| <i>Tenericutes</i>      | 0.33 ± 0.35                      | 0.00 ± 0.00                    |
| <i>ODI</i>              | 0.14 ± 0.06                      | 0.11 ± 0.12                    |

**Supplementary table S6.** Mean relative abundance 15 most abundant bacterial families identified in *Baccharis scandens* and *Solanum chilense* rizhospheres.

| <b>Taxa [Family]</b>       | <i>Baccharis scandens</i> | <i>Solanum chilense</i> |
|----------------------------|---------------------------|-------------------------|
| <i>Micrococcaceae</i>      | 14.30 ± 3.17              | 5.68 ± 3.90             |
| <i>Nocardoidaceae</i>      | 5.29 ± 1.75               | 2.51 ± 0.54             |
| <i>Sphingomonadaceae</i>   | 3.70 ± 0.34               | 3.46 ± 0.81             |
| <i>Streptomycetaceae</i>   | 2.06 ± 1.00               | 3.40 ± 1.67             |
| <i>Rhodospirillaceae</i>   | 1.59 ± 0.36               | 3.06 ± 0.46             |
| <i>Geodermatophilaceae</i> | 3.23 ± 1.59               | 1.01 ± 0.20             |
| <i>Chitinophagaceae</i>    | 1.73 ± 1.20               | 1.93 ± 0.82             |
| <i>Micromonosporaceae</i>  | 1.60 ± 0.30               | 1.72 ± 0.36             |
| <i>Comamonadaceae</i>      | 1.47 ± 0.43               | 1.69 ± 1.53             |
| <i>Pirellulaceae</i>       | 1.10 ± 0.24               | 1.97 ± 1.80             |
| <i>Cytophagaceae</i>       | 1.39 ± 0.55               | 1.28 ± 1.02             |
| <i>Gaiellaceae</i>         | 0.58 ± 0.21               | 1.68 ± 1.53             |
| <i>Planococcaceae</i>      | 1.34 ± 0.56               | 0.86 ± 0.27             |
| <i>Bacillaceae</i>         | 1.44 ± 0.44               | 0.68 ± 0.26             |
| <i>Phyllobacteriaceae</i>  | 0.87 ± 0.26               | 1.23 ± 0.51             |

**Supplementary table S7.** Alpha diversity of rhizosphere fungi. Three measures are shown: Shannon diversity index, observed number of OTUs per sample and Pielou's Evenness.

| <b>SampleID</b> | <b>Rizhosphere</b>        | <b>Shannon</b> |             | <b>Observed OTU</b> |                 | <b>Evenness</b> |                 |
|-----------------|---------------------------|----------------|-------------|---------------------|-----------------|-----------------|-----------------|
| Bs1             | <i>Baccharis scandens</i> | 5.8084         |             | 645                 |                 | 0.6223          |                 |
| Bs2             | <i>Baccharis scandens</i> | 4.8428         | 5.48 ± 0.55 | 635                 | 595.33 ± 77.53  | 0.5201          | 0.5964 ± 0.0672 |
| Bs3             | <i>Baccharis scandens</i> | 5.8095         |             | 506                 |                 | 0.6467          |                 |
| Sc1             | <i>Solanum chilense</i>   | 5.0363         |             | 400                 |                 | 0.5826          |                 |
| Sc2             | <i>Solanum chilense</i>   | 5.6896         | 5.40 ± 0.33 | 754                 | 541.67 ± 187.28 | 0.5952          | 0.5976 ± 0.0163 |
| Sc3             | <i>Solanum chilense</i>   | 5.4598         |             | 471                 |                 | 0.6149          |                 |

**Supplementary table S8.** Alpha diversity of rhizosphere bacteria. Three measures are shown: Shannon diversity index, observed number of OTUs per sample and Pielou's Evenness.

| <b>SampleID</b> | <b>Rizhosphere</b>        | <b>Shannon</b> |             | <b>Observed OTU</b> |               | <b>Evenness</b> |                 |
|-----------------|---------------------------|----------------|-------------|---------------------|---------------|-----------------|-----------------|
| Bs1             | <i>Baccharis scandens</i> | 9.4541         |             | 1299                |               | 0.9140          |                 |
| Bs2             | <i>Baccharis scandens</i> | 9.4260         | 9.44 ± 0.01 | 1182                | 1265 ± 72.95  | 0.9235          | 0.9160 ± 0.0068 |
| Bs3             | <i>Baccharis scandens</i> | 9.4339         |             | 1316                |               | 0.9104          |                 |
| Sc1             | <i>Solanum chilense</i>   | 9.6225         |             | 1134                |               | 0.9483          |                 |
| Sc2             | <i>Solanum chilense</i>   | 9.8587         | 9.58 ± 0.30 | 1548                | 1293 ± 222.86 | 0.9304          | 0.9281 ± 0.0215 |
| Sc3             | <i>Solanum chilense</i>   | 9.2596         |             | 1198                |               | 0.9055          |                 |



**Supplementary table S9.** Relative abundance (%) of *Phylum* that were significantly abundant in one rizhosphere, and their respective LDA scores. Higher values are highlighted (bolder). Relative abundance (%) of *genus* that are significantly more abundant in on rizhosphere and their respective LDA score. Higher values are highlighted (bolder).

| <b>A</b> | <b>Taxa [phylum]</b> | <i>Baccharis scandens</i> | <i>Solanum chilense</i> | <b>LDA Score</b> |
|----------|----------------------|---------------------------|-------------------------|------------------|
|          | <i>Glomeromycota</i> | <b>0.50 ± 0.53</b>        | 0.00 ± 0.00             | 3.46             |
|          | <i>Ascomycota</i>    | <b>82.81 ± 4.69</b>       | 46.08 ± 3.59            | 5.26             |
|          | <i>Basidiomycota</i> | 2.60 ± 1.40               | <b>12.64 ± 2.04</b>     | 4.71             |
| <b>B</b> | <b>Taxa [genus]</b>  | <i>Baccharis scandens</i> | <i>Solanum chilense</i> | <b>LDA Score</b> |
|          | <i>Funneliformis</i> | <b>0.072 ± 0.080</b>      | 0.000 ± 0.000           | 2.79             |
|          | <i>Spizellomyces</i> | <b>0.117 ± 0.087</b>      | 0.004 ± 0.007           | 2.89             |
|          | <i>Scutellinia</i>   | <b>0.074 ± 0.037</b>      | 0.019 ± 0.018           | 3.11             |
|          | <i>Paraphoma</i>     | <b>0.682 ± 0.478</b>      | 0.050 ± 0.008           | 3.50             |
|          | <i>Diversispora</i>  | <b>0.117 ± 0.087</b>      | 0.004 ± 0.007           | 3.53             |
|          | <i>Tricharina</i>    | <b>1.204 ± 0.743</b>      | 0.036 ± 0.032           | 3.72             |
|          | <i>Cadophora</i>     | <b>3.164 ± 2.937</b>      | 0.076 ± 0.132           | 4.14             |
|          | <i>Monosporascus</i> | <b>0.002 ± 0.000</b>      | 0.000 ± 0.000           | 4.61             |
|          | <i>Penicillium</i>   | <b>26.315 ± 21.135</b>    | 1.235 ± 0.951           | 5.16             |
|          | <i>Oidiodendron</i>  | 0.001 ± 0.002             | <b>0.007 ± 0.002</b>    | 3.88             |
|          | <i>Talaromyces</i>   | 0.000 ± 0.000             | <b>0.003 ± 0.002</b>    | 3.10             |

**Supplementary table S10.** Relative abundance (%) of *Phylum* that were significantly abundant in one rizhosphere, and their respective LDA scores. Higher values are highlighted (bolder). Relative abundance (%) of *genus* that are significantly more abundant in on rizhosphere and their respective LDA score. Higher values are highlighted (bolder).

| <b>A</b> | <b>Taxa [phylum]</b>  | <i>Baccharis scandens</i> | <i>Solanum chilense</i> | <b>LDA Score</b> |
|----------|-----------------------|---------------------------|-------------------------|------------------|
|          | <i>Actinobacteria</i> | <b>38.9 ± 3.30</b>        | 26.9 ± 5.27             | 4.75             |
|          | <i>Firmicutes</i>     | <b>4.74 ± 1.20</b>        | 2.36 ± 0.31             | 4.02             |
|          | <i>TM7</i>            | <b>1.53 ± 0.16</b>        | 0.81 ± 0.17             | 3.61             |
|          | <i>Tenericutes</i>    | <b>0.33 ± 0.35</b>        | 0.00 ± 0.00             | 3.23             |
|          | <i>Nitrospirae</i>    | 0.17 ± 0.01               | <b>0.49 ± 0.23</b>      | 3.25             |
| <b>B</b> | <b>Taxa [genus]</b>   | <i>Baccharis scandens</i> | <i>Solanum chilense</i> | <b>LDA Score</b> |
|          | <i>Porifericola</i>   | <b>0.039 ± 0.037</b>      | 0.000 ± 0.000           | 2.60             |
|          | <i>Georgfuchsia</i>   | <b>0.152 ± 0.048</b>      | 0.001 ± 0.001           | 2.99             |
|          | <i>Nodularia</i>      | <b>0.082 ± 0.032</b>      | 0.000 ± 0.000           | 2.99             |
|          | <i>Nostoc</i>         | <b>0.253 ± 0.209</b>      | 0.000 ± 0.000           | 3.13             |
|          | <i>Sporichthya</i>    | <b>0.179 ± 0.036</b>      | 0.017 ± 0.029           | 2.97             |
|          | <i>Kineosporia</i>    | <b>0.137 ± 0.045</b>      | 0.046 ± 0.044           | 2.74             |
|          | <i>Methylotenera</i>  | <b>0.043 ± 0.016</b>      | 0.000 ± 0.000           | 2.77             |
|          | <i>Lentzea</i>        | <b>0.173 ± 0.069</b>      | 0.059 ± 0.063           | 2.83             |
|          | <i>Oscillochloris</i> | <b>0.069 ± 0.027</b>      | 0.009 ± 0.016           | 3.06             |
|          | <i>Haloferula</i>     | <b>0.079 ± 0.075</b>      | 0.000 ± 0.000           | 2.78             |
|          | <i>Rhodocytophaga</i> | <b>0.234 ± 0.119</b>      | 0.065 ± 0.058           | 2.95             |
|          | <i>Bacillus</i>       | <b>0.631 ± 0.107</b>      | 0.369 ± 0.109           | 3.08             |
|          | <i>Asteroleplasma</i> | <b>0.325 ± 0.348</b>      | 0.002 ± 0.004           | 3.23             |
|          | <i>Rhizobium</i>      | <b>0.602 ± 0.324</b>      | 0.093 ± 0.116           | 3.39             |
|          | <i>Blastococcus</i>   | <b>2.757 ± 1.191</b>      | 0.866 ± 0.203           | 4.01             |
|          | <i>Arthrobacter</i>   | <b>14.17 ± 2.973</b>      | 5.558 ± 3.693           | 4.67             |
|          | <i>Methylovorus</i>   | 0.000 ± 0.000             | <b>0.121 ± 0.136</b>    | 2.87             |
|          | <i>Nitrospira</i>     | 0.166 ± 0.013             | <b>0.486 ± 0.228</b>    | 3.25             |
|          | <i>Dongia</i>         | 0.017 ± 0.030             | <b>0.120 ± 0.035</b>    | 2.79             |
|          | <i>Reyranella</i>     | 0.057 ± 0.051             | <b>0.325 ± 0.081</b>    | 3.15             |
|          | <i>Lactobacillus</i>  | 0.000 ± 0.000             | <b>0.018 ± 0.012</b>    | 3.01             |
|          | <i>Fimbriimonas</i>   | 0.000 ± 0.000             | <b>0.091 ± 0.057</b>    | 2.99             |
|          | <i>Rhodopila</i>      | 0.000 ± 0.000             | <b>0.130 ± 0.114</b>    | 2.85             |

**Supplementary table S11.** Relative abundance (%) of functional annotations by plant hosts.

| <b>Annotation</b>             | <b><i>Baccharis scandens</i></b> | <b><i>Solanum chilense</i></b> |
|-------------------------------|----------------------------------|--------------------------------|
| Chemoheterotrophy             | 36.66 ± 4.16                     | 34.51 ± 2.12                   |
| Aerobic chemoheterotrophy     | 35.36 ± 4.09                     | 31.72 ± 3.11                   |
| Aromatic compound degradation | 7.19 ± 3.39                      | 4.00 ± 1.12                    |
| Chloroplasts                  | 0.45 ± 0.52                      | 10.17 ± 4.83                   |
| Phototrophy                   | 2.92 ± 2.10                      | 1.43 ± 0.21                    |
| Photoautotrophy               | 2.87 ± 2.16                      | 0.88 ± 0.22                    |
| Cyanobacteria                 | 2.86 ± 2.17                      | 0.80 ± 0.32                    |
| Oxygenic photoautotrophy      | 2.86 ± 2.17                      | 0.80 ± 0.32                    |
| Ureolysis                     | 1.67 ± 1.41                      | 1.93 ± 1.71                    |
| Nitrification                 | 0.49 ± 0.10                      | 1.65 ± 1.09                    |
| Intracellular parasites       | 0.41 ± 0.29                      | 1.47 ± 0.34                    |
| Nitrogen fixation             | 1.06 ± 0.48                      | 0.77 ± 0.42                    |
| Hydrocarbon degradation       | 1.00 ± 0.90                      | 0.79 ± 0.16                    |
| Chitinolysis                  | 0.53 ± 0.26                      | 0.98 ± 0.59                    |
| Aerobic nitrite oxidation     | 0.32 ± 0.02                      | 1.17 ± 0.82                    |

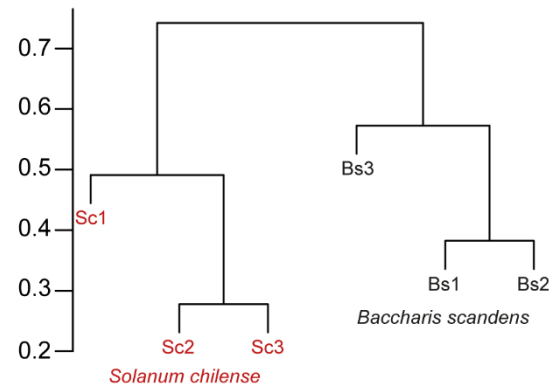

**Supplementary Figure S1.** Hierarchical clustering analysis of fungal communities.

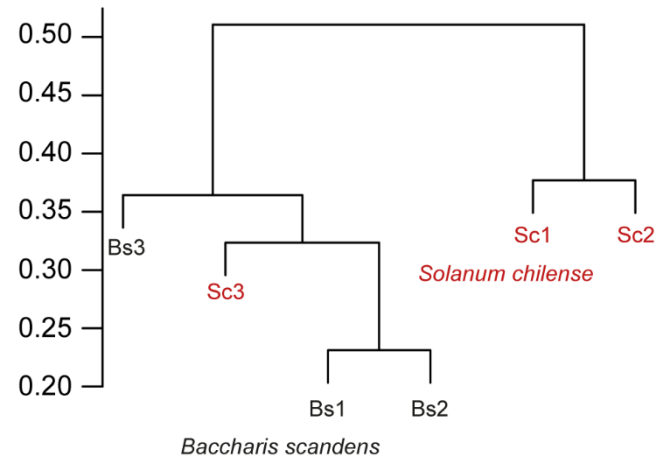

**Supplementary Figure S2.** Hierarchical clustering analysis of bacterial communities.
